# Supplementary material for: Systems Pharmacology-Based Method to Assess the Mechanism of Action of Weight-Loss Herbal Intervention Therapy for Obesity
Source: Front Pharmacol. 2019 Oct 14;10:1165. doi: 10.3389/fphar.2019.01165 (PMC6802489; doi:10.3389/fphar.2019.01165)
Supplement: Table S1 — The information of 51 active compounds in W-LHIT. [file Table_1.xlsx]

## Sheet: Sheet1
MolID	Molecule Name	CAS	OB（%）	DL
HL1	(R)-Canadine	2086-96-6	55.37	0.77
HL2	Corchoroside A	508-76-9	104.95	0.78
HL3	Epiberberine	6873-09-2	43.09	0.78
HL4	Magnograndiolide	92618-98-9	63.71	0.19
HL5	Moupinamide	65646-26-6	86.71	0.26
HL6	Obacunone	751-03-1	43.29	0.77
HL7	Palmatine	3486-67-7	64.6	0.65
HL8	Quercetin	117-39-5	46.43	0.28
HL9	Worenine	38763-29-0	45.83	0.87
HQ1	3,9-Di-O-methylnissolin		53.74	0.48
HQ2	5'-Hydroxyiso-muronulatol-2',5'-di-O-glucoside		41.72	0.69
HQ3	7-O-methylisomucronulatol (9,10-dimethoxypterocarpan-3-O-beta-D-glucoside_qt)		74.69	0.3
HQ4	Astrapterocarpan	73340-41-7	64.26	0.42
HQ5	Betulinic acid	472-15-1	55.38	0.78
HQ6	Calycosin	20575-57-9	47.75	0.24
HQ7	Folic acid	59-30-3	68.96	0.71
HQ8	Formononetin	485-72-3	69.67	0.21
HQ9	Isomucronulatol	52250-35-8	67.67	0.26
HQ10	Isomucronulatol-7,2'-di-O-glucosiole		49.28	0.62
HQ11	Isorhamnetin	480-19-3	49.6	0.31
HQ12	Kaempferol	520-18-3	41.88	0.24
HQ13	Kumatakenin	3301-49-3	50.83	0.29
HQ14	Quercetin	117-39-5	46.43	0.28
HY1	(-)-Catechin	18829-70-4	49.68	0.24
HY2	(1S)-1-(4-hydroxybenzyl)-2-methyl-3,4-dihydro-1H-isoquinoline-6,7-diol		67.14	0.23
HY3	Armepavine	524-20-9	69.31	0.29
HY4	Epicatechin	35323-91-2	48.96	0.24
HY5	Isorhamnetin	480-19-3	49.6	0.31
HY6	Kaempferol	520-18-3	41.88	0.24
HY7	Machiline	15548-30-8	79.64	0.24
HY8	Quercetin	117-39-5	46.43	0.28
HY9	Roemerine	548-08-3	40.75	0.52
MG1	Betulinic acid	472-15-1	55.38	0.78
MG2	Epicatechin	35323-91-2	48.96	0.24
MG3	Quercetin	117-39-5	46.43	0.28
ZQ1	Hesperetin	520-33-2	70.31	0.27
ZQ2	Naringenin	480-41-1	59.29	0.21
ZQ3	Nobiletin	478-01-3	61.67	0.52
LZ1	Epoxyganoderiol B	114020-57-4	42.3	0.83
LZ2	Ergosta-4,6,8(14),22-tetraene-3-one	19254-69-4	48.32	0.75
LZ3	Ergosta-7,22-dien-3-yllinoleate	138349-20-9	45.11	0.37
LZ4	Ergosta-7,9(11),22-Trien-3β,5α,6α-Triol		46.95	0.78
LZ5	Ergosterol peroxide	2061-64-5	44.39	0.82
LZ6	Ganoderal B	114020-55-2	42.19	0.81
LZ7	Ganoderic aldehyde A	126313-85-7	42.26	0.81
LZ8	Ganoderol A	104700-97-2	44.69	0.8
LZ9	Ganodosterone	19698-66-9	47.86	0.77
LZ10	Lucialdehyde A	420781-84-6	44.78	0.8
LZ11	Lucialdehyde B	480439-84-7	43.12	0.81
LZ12	Lucialdehyde C	252351-96-5	42.26	0.81
LZ13	Stellasterol	2465-11-4	43.51	0.72
