# Supplementary material for: Systems Pharmacology-Based Method to Assess the Mechanism of Action of Weight-Loss Herbal Intervention Therapy for Obesity
Source: Front Pharmacol. 2019 Oct 14;10:1165. doi: 10.3389/fphar.2019.01165 (PMC6802489; doi:10.3389/fphar.2019.01165)
Supplement: Table S2 — The interactions between the targets and related diseases. [file Table_2.xlsx]

## Sheet: Sheet1
MolID	Molecule Name	Target Name	Gene Name	Disease Name
HL1	(R)-Canadine	Alpha-1A adrenergic receptor	ADRA1A	Cardiovascular disease
HL1	(R)-Canadine	Coagulation factor Xa	F10	Cardiovascular disease
HL1	(R)-Canadine	Estrogen receptor	ESR1	Cardiovascular disease
HL1	(R)-Canadine	Nitric oxide synthase, endothelial	NOS3	Cardiovascular disease
HL1	(R)-Canadine	Thrombin	F2	Cardiovascular disease
HL1	(R)-Canadine	5-hydroxytryptamine 2A receptor	HTR2A	Diabetes
HL1	(R)-Canadine	Alpha-1D adrenergic receptor	ADRA1D	Diabetes
HL1	(R)-Canadine	Dopamine D1 receptor	DRD1	Diabetes
HL1	(R)-Canadine	Glycogen synthase kinase-3 beta	GSK3B	Diabetes
HL1	(R)-Canadine	Androgen receptor	AR	Fatty liver
HL1	(R)-Canadine	Delta-type opioid receptor	OPRD1	Gastrointestinal disease
HL1	(R)-Canadine	Estrogen receptor beta	ESR2	Gastrointestinal disease
HL1	(R)-Canadine	Mitogen-activated protein kinase 14	MAPK14	Inflammation
HL1	(R)-Canadine	Prostaglandin G/H synthase 1	PTGS1	Inflammation
HL1	(R)-Canadine	Prostaglandin G/H synthase 2	PTGS2	Inflammation
HL1	(R)-Canadine	5-hydroxytryptamine 2C receptor	HTR2C	Obesity
HL1	(R)-Canadine	Acetylcholinesterase	ACHE	Obesity
HL1	(R)-Canadine	Alpha-1B adrenergic receptor	ADRA1B	Obesity
HL1	(R)-Canadine	Alpha-2C adrenergic receptor	ADRA2C	Obesity
HL1	(R)-Canadine	Beta-2 adrenergic receptor	ADRB2	Obesity
HL1	(R)-Canadine	Calmodulin	CaM	Obesity
HL1	(R)-Canadine	Dipeptidyl peptidase IV	DPP4	Obesity
HL1	(R)-Canadine	Mu-type opioid receptor	OPRM1	Obesity
HL1	(R)-Canadine	Nitric oxide synthase, inducible	NOS2	Obesity
HL1	(R)-Canadine	Peroxisome proliferator activated receptor gamma	PPARG	Obesity
HL1	(R)-Canadine	Sodium-dependent dopamine transporter	SLC6A3	Obesity
HL1	(R)-Canadine	Sodium-dependent noradrenaline transporter	SLC6A2	Obesity
HL1	(R)-Canadine	Sodium-dependent serotonin transporter	SLC6A4	Obesity
HL2	Corchoroside A	Mineralocorticoid receptor	NR3C2	Cancer
HL2	Corchoroside A	Estrogen receptor	ESR1	Cardiovascular disease
HL2	Corchoroside A	Androgen receptor	AR	Fatty liver
HL2	Corchoroside A	Glucocorticoid receptor	NR3C1	Obesity
HL2	Corchoroside A	Nitric oxide synthase, inducible	NOS2	Obesity
HL3	Epiberberine	Estrogen receptor	ESR1	Cardiovascular disease
HL3	Epiberberine	Nitric oxide synthase, endothelial	NOS3	Cardiovascular disease
HL3	Epiberberine	Thrombin	F2	Cardiovascular disease
HL3	Epiberberine	Glycogen synthase kinase-3 beta	GSK3B	Diabetes
HL3	Epiberberine	Androgen receptor	AR	Fatty liver
HL3	Epiberberine	Estrogen receptor beta	ESR2	Gastrointestinal disease
HL3	Epiberberine	Mitogen-activated protein kinase 14	MAPK14	Inflammation
HL3	Epiberberine	Prostaglandin G/H synthase 2	PTGS2	Inflammation
HL3	Epiberberine	Acetylcholinesterase	ACHE	Obesity
HL3	Epiberberine	Dipeptidyl peptidase IV	DPP4	Obesity
HL3	Epiberberine	Nitric oxide synthase, inducible	NOS2	Obesity
HL3	Epiberberine	Peroxisome proliferator activated receptor gamma	PPARG	Obesity
HL4	Magnograndiolide	Dipeptidyl peptidase IV	DPP4	Obesity
HL5	Moupinamide	Nuclear factor erythroid 2-related factor 2	NFE2L2	Cardiovascular disease
HL6	Obacunone	Macrophage migration inhibitory factor	MIF	Inflammation
HL7	Palmatine	Estrogen receptor	ESR1	Cardiovascular disease
HL7	Palmatine	Nitric oxide synthase, endothelial	NOS3	Cardiovascular disease
HL7	Palmatine	Thrombin	F2	Cardiovascular disease
HL7	Palmatine	Coagulation factor VII	F7	Diabetes
HL7	Palmatine	Glycogen synthase kinase-3 beta	GSK3B	Diabetes
HL7	Palmatine	Androgen receptor	AR	Fatty liver
HL7	Palmatine	Estrogen receptor beta	ESR2	Gastrointestinal disease
HL7	Palmatine	Mitogen-activated protein kinase 14	MAPK14	Inflammation
HL7	Palmatine	Prostaglandin G/H synthase 1	PTGS1	Inflammation
HL7	Palmatine	Prostaglandin G/H synthase 2	PTGS2	Inflammation
HL7	Palmatine	Acetylcholinesterase	ACHE	Obesity
HL7	Palmatine	Beta-2 adrenergic receptor	ADRB2	Obesity
HL7	Palmatine	Calmodulin	CaM	Obesity
HL7	Palmatine	Dipeptidyl peptidase IV	DPP4	Obesity
HL7	Palmatine	Nitric oxide synthase, inducible	NOS2	Obesity
HL7	Palmatine	Peroxisome proliferator activated receptor gamma	PPARG	Obesity
HL8	Quercetin	78 kDa glucose-regulated protein	HSPA5	Cancer
HL8	Quercetin	Caspase-9	CASP9	Cancer
HL8	Quercetin	Cell division control protein 2 homolog	CDK1	Cancer
HL8	Quercetin	Homeobox protein Nkx-3.1	NKX3-1	Cancer
HL8	Quercetin	Hypoxia-inducible factor 1-alpha	HIF1A	Cancer
HL8	Quercetin	Myc proto-oncogene protein	MYC	Cancer
HL8	Quercetin	NAD(P)H dehydrogenase [quinone] 1	NQO1	Cancer
HL8	Quercetin	Poly [ADP-ribose] polymerase 1	PARP1	Cancer
HL8	Quercetin	Urokinase-type plasminogen activator	PLAU	Cancer
HL8	Quercetin	Cathepsin D	CTSD	Cardiovascular disease
HL8	Quercetin	G2/mitotic-specific cyclin-B1	CCNB1	Cardiovascular disease
HL8	Quercetin	Neutrophil cytosol factor 1	NCF1	Cardiovascular disease
HL8	Quercetin	Nitric oxide synthase, endothelial	NOS3	Cardiovascular disease
HL8	Quercetin	Nuclear factor erythroid 2-related factor 2	NFE2L2	Cardiovascular disease
HL8	Quercetin	Serum paraoxonase/arylesterase 1	PON1	Cardiovascular disease
HL8	Quercetin	Thrombomodulin	THBD	Cardiovascular disease
HL8	Quercetin	Tissue-type plasminogen activator	PLAT	Cardiovascular disease
HL8	Quercetin	Transcription factor E2F2	E2F2	Cardiovascular disease
HL8	Quercetin	Vascular cell adhesion protein 1	VCAM1	Cardiovascular disease
HL8	Quercetin	Xanthine dehydrogenase/oxidase	XDH	Cardiovascular disease
HL8	Quercetin	Caspase-3	CASP3	Diabetes
HL8	Quercetin	Caspase-8	CASP8	Diabetes
HL8	Quercetin	C-C motif chemokine 2	CCL2	Diabetes
HL8	Quercetin	CD40 ligand	CD40LG	Diabetes
HL8	Quercetin	Estrogen sulfotransferase	SULT1E1	Diabetes
HL8	Quercetin	Insulin receptor	INSR	Diabetes
HL8	Quercetin	Interferon gamma	IFNG	Diabetes
HL8	Quercetin	Interferon regulatory factor 1	IRF1	Diabetes
HL8	Quercetin	Interleukin-1 beta	IL1B	Diabetes
HL8	Quercetin	Maltase-glucoamylase, intestinal	MGAM	Diabetes
HL8	Quercetin	Plasminogen activator inhibitor 1	SERPINE1	Diabetes
HL8	Quercetin	RAF proto-oncogene serine/threonine-protein kinase	RAF1	Diabetes
HL8	Quercetin	Runt-related transcription factor 2	RUNX2	Diabetes
HL8	Quercetin	Solute carrier family 2, facilitated glucose transporter member 4	SLC2A4	Diabetes
HL8	Quercetin	Transcription factor E2F1	E2F1	Diabetes
HL8	Quercetin	Aryl hydrocarbon receptor	AHR	Fatty liver
HL8	Quercetin	Claudin-4	CLDN4	Fatty liver
HL8	Quercetin	C-reactive protein	CRP	Fatty liver
HL8	Quercetin	Cytochrome P450 1B1	CYP1B1	Fatty liver
HL8	Quercetin	Heme oxygenase 1	HMOX1	Fatty liver
HL8	Quercetin	Insulin-like growth factor II	IGF2	Fatty liver
HL8	Quercetin	Insulin-like growth factor-binding protein 3	IGFBP3	Fatty liver
HL8	Quercetin	Superoxide dismutase [Cu-Zn]	SOD1	Fatty liver
HL8	Quercetin	Epidermal growth factor receptor	EGFR	Gastrointestinal disease
HL8	Quercetin	Receptor tyrosine-protein kinase erbB-2	ERBB2	Gastrointestinal disease
HL8	Quercetin	E-selectin	SELE	Inflammation
HL8	Quercetin	Inhibitor of nuclear factor kappa-B kinase subunit alpha	CHUK	Inflammation
HL8	Quercetin	Interleukin-10	IL10	Inflammation
HL8	Quercetin	Interleukin-2	IL2	Inflammation
HL8	Quercetin	Interleukin-6	IL6	Inflammation
HL8	Quercetin	Interleukin-8	CXCL8	Inflammation
HL8	Quercetin	Ornithine decarboxylase	ODC1	Inflammation
HL8	Quercetin	Tumor necrosis factor	TNF	Inflammation
HL8	Quercetin	Caveolin-1	CAV1	Obesity
HL8	Quercetin	Hexokinase-2	HK2	Obesity
HL8	Quercetin	Intercellular adhesion molecule 1	ICAM1	Obesity
HL8	Quercetin	Myeloperoxidase	MPO	Obesity
HL8	Quercetin	Osteopontin	SPP1	Obesity
HL8	Quercetin	Peroxisome proliferator activated receptor alpha	PPARA	Obesity
HL8	Quercetin	Peroxisome proliferator activated receptor delta	PPARD	Obesity
HL8	Quercetin	Peroxisome proliferator activated receptor gamma	PPARG	Obesity
HL8	Quercetin	Protein kinase C beta type	PRKCB	Obesity
HL8	Quercetin	Tissue factor	F3	Obesity
HL8	Quercetin	Transforming growth factor beta-1	TGFB1	Obesity
HL8	Quercetin	Vascular endothelial growth factor A	VEGFA	Obesity
HL8	Quercetin	72 kDa type IV collagenase	MMP2	Osteoporosis
HL8	Quercetin	Arachidonate 5-lipoxygenase	ALOX5	Osteoporosis
HL8	Quercetin	Interstitial collagenase	MMP1	Osteoporosis
HL8	Quercetin	Matrix metalloproteinase-9	MMP9	Osteoporosis
HL8	Quercetin	Transcription factor AP-1	JUN	Osteoporosis
HL9	Worenine	Estrogen receptor	ESR1	Cardiovascular disease
HL9	Worenine	Thrombin	F2	Cardiovascular disease
HL9	Worenine	Glycogen synthase kinase-3 beta	GSK3B	Diabetes
HL9	Worenine	Androgen receptor	AR	Fatty liver
HL9	Worenine	Estrogen receptor beta	ESR2	Gastrointestinal disease
HL9	Worenine	Mitogen-activated protein kinase 14	MAPK14	Inflammation
HL9	Worenine	Prostaglandin G/H synthase 1	PTGS1	Inflammation
HL9	Worenine	Prostaglandin G/H synthase 2	PTGS2	Inflammation
HL9	Worenine	Acetylcholinesterase	ACHE	Obesity
HL9	Worenine	Nitric oxide synthase, inducible	NOS2	Obesity
HL9	Worenine	Peroxisome proliferator activated receptor gamma	PPARG	Obesity
HQ1	3,9-Di-O-methylnissolin	Prostaglandin G/H synthase 2	PTGS2	Inflammation
HQ1	3,9-Di-O-methylnissolin	Prostaglandin G/H synthase 1	PTGS1	Inflammation
HQ1	3,9-Di-O-methylnissolin	Peroxisome proliferator activated receptor gamma	PPARG	Obesity
HQ1	3,9-Di-O-methylnissolin	Mu-type opioid receptor	OPRM1	Obesity
HQ1	3,9-Di-O-methylnissolin	Nitric oxide synthase, endothelial	NOS3	Cardiovascular disease
HQ1	3,9-Di-O-methylnissolin	Nitric oxide synthase, inducible	NOS2	Obesity
HQ1	3,9-Di-O-methylnissolin	Mitogen-activated protein kinase 14	MAPK14	Inflammation
HQ1	3,9-Di-O-methylnissolin	Glycogen synthase kinase-3 beta	GSK3B	Diabetes
HQ1	3,9-Di-O-methylnissolin	Thrombin	F2	Cardiovascular disease
HQ1	3,9-Di-O-methylnissolin	Estrogen receptor beta	ESR2	Gastrointestinal disease
HQ1	3,9-Di-O-methylnissolin	Estrogen receptor	ESR1	Cardiovascular disease
HQ1	3,9-Di-O-methylnissolin	Dipeptidyl peptidase IV	DPP4	Obesity
HQ1	3,9-Di-O-methylnissolin	Calmodulin	CaM	Obesity
HQ1	3,9-Di-O-methylnissolin	Androgen receptor	AR	Fatty liver
HQ1	3,9-Di-O-methylnissolin	Beta-2 adrenergic receptor	ADRB2	Obesity
HQ1	3,9-Di-O-methylnissolin	Beta-1 adrenergic receptor	ADRB1	Obesity
HQ1	3,9-Di-O-methylnissolin	Alpha-2C adrenergic receptor	ADRA2C	Obesity
HQ1	3,9-Di-O-methylnissolin	Alpha-1D adrenergic receptor	ADRA1D	Diabetes
HQ1	3,9-Di-O-methylnissolin	Alpha-1B adrenergic receptor	ADRA1B	Obesity
HQ1	3,9-Di-O-methylnissolin	Acetylcholinesterase	ACHE	Obesity
HQ10	Isomucronulatol-7,2'-di-O-glucosiole	DNA topoisomerase II	TOP2B	Cancer
HQ11	Isorhamnetin	Xanthine dehydrogenase/oxidase	XDH	Cardiovascular disease
HQ11	Isorhamnetin	Oxidized low-density lipoprotein receptor 1	OLR1	Fatty liver
HQ11	Isorhamnetin	Neutrophil cytosol factor 1	NCF1	Cardiovascular disease
HQ12	Kaempferol	DNA topoisomerase II	TOP2B	Cancer
HQ12	Kaempferol	Sodium-dependent noradrenaline transporter	SLC6A2	Obesity
HQ12	Kaempferol	Prostaglandin G/H synthase 2	PTGS2	Inflammation
HQ12	Kaempferol	Prostaglandin G/H synthase 1	PTGS1	Inflammation
HQ12	Kaempferol	Peroxisome proliferator activated receptor gamma	PPARG	Obesity
HQ12	Kaempferol	Progesterone receptor	PGR	Osteoporosis
HQ12	Kaempferol	Nitric oxide synthase, endothelial	NOS3	Cardiovascular disease
HQ12	Kaempferol	Nitric oxide synthase, inducible	NOS2	Obesity
HQ12	Kaempferol	Mitogen-activated protein kinase 14	MAPK14	Inflammation
HQ12	Kaempferol	Glycogen synthase kinase-3 beta	GSK3B	Diabetes
HQ12	Kaempferol	Coagulation factor VII	F7	Diabetes
HQ12	Kaempferol	Thrombin	F2	Cardiovascular disease
HQ12	Kaempferol	Estrogen receptor beta	ESR2	Gastrointestinal disease
HQ12	Kaempferol	Estrogen receptor	ESR1	Cardiovascular disease
HQ12	Kaempferol	Dipeptidyl peptidase IV	DPP4	Obesity
HQ12	Kaempferol	Calmodulin	CaM	Obesity
HQ12	Kaempferol	Androgen receptor	AR	Fatty liver
HQ12	Kaempferol	Alpha-1B adrenergic receptor	ADRA1B	Obesity
HQ12	Kaempferol	Acetylcholinesterase	ACHE	Obesity
HQ13	Kumatakenin	Prostaglandin G/H synthase 2	PTGS2	Inflammation
HQ13	Kumatakenin	Prostaglandin G/H synthase 1	PTGS1	Inflammation
HQ13	Kumatakenin	Peroxisome proliferator activated receptor gamma	PPARG	Obesity
HQ13	Kumatakenin	Nitric oxide synthase, inducible	NOS2	Obesity
HQ13	Kumatakenin	Mitogen-activated protein kinase 14	MAPK14	Inflammation
HQ13	Kumatakenin	Glycogen synthase kinase-3 beta	GSK3B	Diabetes
HQ13	Kumatakenin	Estrogen receptor beta	ESR2	Gastrointestinal disease
HQ13	Kumatakenin	Estrogen receptor	ESR1	Cardiovascular disease
HQ13	Kumatakenin	Dipeptidyl peptidase IV	DPP4	Obesity
HQ13	Kumatakenin	Calmodulin	CaM	Obesity
HQ13	Kumatakenin	Androgen receptor	AR	Fatty liver
HQ14	Quercetin	Xanthine dehydrogenase/oxidase	XDH	Cardiovascular disease
HQ14	Quercetin	Vascular endothelial growth factor A	VEGFA	Obesity
HQ14	Quercetin	Vascular cell adhesion protein 1	VCAM1	Cardiovascular disease
HQ14	Quercetin	Tumor necrosis factor	TNF	Inflammation
HQ14	Quercetin	Thrombomodulin	THBD	Cardiovascular disease
HQ14	Quercetin	Transforming growth factor beta-1	TGFB1	Obesity
HQ14	Quercetin	Estrogen sulfotransferase	SULT1E1	Diabetes
HQ14	Quercetin	Osteopontin	SPP1	Obesity
HQ14	Quercetin	Superoxide dismutase [Cu-Zn]	SOD1	Fatty liver
HQ14	Quercetin	Solute carrier family 2, facilitated glucose transporter member 4	SLC2A4	Diabetes
HQ14	Quercetin	Plasminogen activator inhibitor 1	SERPINE1	Diabetes
HQ14	Quercetin	E-selectin	SELE	Inflammation
HQ14	Quercetin	Runt-related transcription factor 2	RUNX2	Diabetes
HQ14	Quercetin	RAF proto-oncogene serine/threonine-protein kinase	RAF1	Diabetes
HQ14	Quercetin	Protein kinase C beta type	PRKCB	Obesity
HQ14	Quercetin	Peroxisome proliferator activated receptor gamma	PPARG	Obesity
HQ14	Quercetin	Peroxisome proliferator activated receptor delta	PPARD	Obesity
HQ14	Quercetin	Peroxisome proliferator activated receptor alpha	PPARA	Obesity
HQ14	Quercetin	Serum paraoxonase/arylesterase 1	PON1	Cardiovascular disease
HQ14	Quercetin	Urokinase-type plasminogen activator	PLAU	Cancer
HQ14	Quercetin	Tissue-type plasminogen activator	PLAT	Cardiovascular disease
HQ14	Quercetin	Poly [ADP-ribose] polymerase 1	PARP1	Cancer
HQ14	Quercetin	Ornithine decarboxylase	ODC1	Inflammation
HQ14	Quercetin	NAD(P)H dehydrogenase [quinone] 1	NQO1	Cancer
HQ14	Quercetin	Nitric oxide synthase, endothelial	NOS3	Cardiovascular disease
HQ14	Quercetin	Homeobox protein Nkx-3.1	NKX3-1	Cancer
HQ14	Quercetin	Nuclear factor erythroid 2-related factor 2	NFE2L2	Cardiovascular disease
HQ14	Quercetin	Neutrophil cytosol factor 1	NCF1	Cardiovascular disease
HQ14	Quercetin	Myc proto-oncogene protein	MYC	Cancer
HQ14	Quercetin	Myeloperoxidase	MPO	Obesity
HQ14	Quercetin	Matrix metalloproteinase-9	MMP9	Osteoporosis
HQ14	Quercetin	72 kDa type IV collagenase	MMP2	Inflammation
HQ14	Quercetin	Interstitial collagenase	MMP1	Osteoporosis
HQ14	Quercetin	Maltase-glucoamylase, intestinal	MGAM	Diabetes
HQ14	Quercetin	Transcription factor AP-1	JUN	Osteoporosis
HQ14	Quercetin	Interferon regulatory factor 1	IRF1	Diabetes
HQ14	Quercetin	Insulin receptor	INSR	Diabetes
HQ14	Quercetin	Interleukin-6	IL6	Inflammation
HQ14	Quercetin	Interleukin-2	IL2	Inflammation
HQ14	Quercetin	Interleukin-1 beta	IL1B	Diabetes
HQ14	Quercetin	Interleukin-10	IL10	Inflammation
HQ14	Quercetin	Insulin-like growth factor-binding protein 3	IGFBP3	Fatty liver
HQ14	Quercetin	Insulin-like growth factor II	IGF2	Fatty liver
HQ14	Quercetin	Interferon gamma	IFNG	Diabetes
HQ14	Quercetin	Intercellular adhesion molecule 1	ICAM1	Obesity
HQ14	Quercetin	78 kDa glucose-regulated protein	HSPA5	Cancer
HQ14	Quercetin	Heme oxygenase 1	HMOX1	Fatty liver
HQ14	Quercetin	Hexokinase-2	HK2	Obesity
HQ14	Quercetin	Hypoxia-inducible factor 1-alpha	HIF1A	Cancer
HQ14	Quercetin	Tissue factor	F3	Obesity
HQ14	Quercetin	Receptor tyrosine-protein kinase erbB-2	ERBB2	Gastrointestinal disease
HQ14	Quercetin	Epidermal growth factor receptor	EGFR	Gastrointestinal disease
HQ14	Quercetin	Transcription factor E2F2	E2F2	Cardiovascular disease
HQ14	Quercetin	Transcription factor E2F1	E2F1	Diabetes
HQ14	Quercetin	Cytochrome P450 1B1	CYP1B1	Fatty liver
HQ14	Quercetin	Interleukin-8	CXCL8	Inflammation
HQ14	Quercetin	Cathepsin D	CTSD	Cardiovascular disease
HQ14	Quercetin	C-reactive protein	CRP	Fatty liver
HQ14	Quercetin	Claudin-4	CLDN4	Fatty liver
HQ14	Quercetin	Inhibitor of nuclear factor kappa-B kinase subunit alpha	CHUK	Inflammation
HQ14	Quercetin	Cell division control protein 2 homolog	CDK1	Cancer
HQ14	Quercetin	CD40 ligand	CD40LG	Diabetes
HQ14	Quercetin	G2/mitotic-specific cyclin-B1	CCNB1	Cardiovascular disease
HQ14	Quercetin	C-C motif chemokine 2	CCL2	Diabetes
HQ14	Quercetin	Caveolin-1	CAV1	Fatty liver
HQ14	Quercetin	Caspase-9	CASP9	Cancer
HQ14	Quercetin	Caspase-8	CASP8	Diabetes
HQ14	Quercetin	Caspase-3	CASP3	Diabetes
HQ14	Quercetin	Arachidonate 5-lipoxygenase	ALOX5	Osteoporosis
HQ14	Quercetin	Aryl hydrocarbon receptor	AHR	Fatty liver
HQ2	5'-Hydroxyiso-muronulatol-2',5'-di-O-glucoside	Interleukin-2	IL2	Inflammation
HQ3	7-O-methylisomucronulatol (9,10-dimethoxypterocarpan-3-O-beta-D-glucoside_qt)	Sodium-dependent serotonin transporter	SLC6A4	Obesity
HQ3	7-O-methylisomucronulatol (9,10-dimethoxypterocarpan-3-O-beta-D-glucoside_qt)	Sodium-dependent dopamine transporter	SLC6A3	Obesity
HQ3	7-O-methylisomucronulatol (9,10-dimethoxypterocarpan-3-O-beta-D-glucoside_qt)	Prostaglandin G/H synthase 2	PTGS2	Inflammation
HQ3	7-O-methylisomucronulatol (9,10-dimethoxypterocarpan-3-O-beta-D-glucoside_qt)	Prostaglandin G/H synthase 1	PTGS1	Inflammation
HQ3	7-O-methylisomucronulatol (9,10-dimethoxypterocarpan-3-O-beta-D-glucoside_qt)	Peroxisome proliferator activated receptor gamma	PPARG	Obesity
HQ3	7-O-methylisomucronulatol (9,10-dimethoxypterocarpan-3-O-beta-D-glucoside_qt)	Delta-type opioid receptor	OPRD1	Gastrointestinal disease
HQ3	7-O-methylisomucronulatol (9,10-dimethoxypterocarpan-3-O-beta-D-glucoside_qt)	Nitric oxide synthase, endothelial	NOS3	Cardiovascular disease
HQ3	7-O-methylisomucronulatol (9,10-dimethoxypterocarpan-3-O-beta-D-glucoside_qt)	Nitric oxide synthase, inducible	NOS2	Obesity
HQ3	7-O-methylisomucronulatol (9,10-dimethoxypterocarpan-3-O-beta-D-glucoside_qt)	Mitogen-activated protein kinase 14	MAPK14	Inflammation
HQ3	7-O-methylisomucronulatol (9,10-dimethoxypterocarpan-3-O-beta-D-glucoside_qt)	5-hydroxytryptamine 2A receptor	HTR2A	Diabetes
HQ3	7-O-methylisomucronulatol (9,10-dimethoxypterocarpan-3-O-beta-D-glucoside_qt)	Glycogen synthase kinase-3 beta	GSK3B	Diabetes
HQ3	7-O-methylisomucronulatol (9,10-dimethoxypterocarpan-3-O-beta-D-glucoside_qt)	Thrombin	F2	Cardiovascular disease
HQ3	7-O-methylisomucronulatol (9,10-dimethoxypterocarpan-3-O-beta-D-glucoside_qt)	Coagulation factor Xa	F10	Cardiovascular disease
HQ3	7-O-methylisomucronulatol (9,10-dimethoxypterocarpan-3-O-beta-D-glucoside_qt)	Estrogen receptor beta	ESR2	Gastrointestinal disease
HQ3	7-O-methylisomucronulatol (9,10-dimethoxypterocarpan-3-O-beta-D-glucoside_qt)	Estrogen receptor	ESR1	Cardiovascular disease
HQ3	7-O-methylisomucronulatol (9,10-dimethoxypterocarpan-3-O-beta-D-glucoside_qt)	Dopamine D1 receptor	DRD1	Diabetes
HQ3	7-O-methylisomucronulatol (9,10-dimethoxypterocarpan-3-O-beta-D-glucoside_qt)	Dipeptidyl peptidase IV	DPP4	Obesity
HQ3	7-O-methylisomucronulatol (9,10-dimethoxypterocarpan-3-O-beta-D-glucoside_qt)	Calmodulin	CaM	Obesity
HQ3	7-O-methylisomucronulatol (9,10-dimethoxypterocarpan-3-O-beta-D-glucoside_qt)	Androgen receptor	AR	Fatty liver
HQ3	7-O-methylisomucronulatol (9,10-dimethoxypterocarpan-3-O-beta-D-glucoside_qt)	Beta-2 adrenergic receptor	ADRB2	Obesity
HQ3	7-O-methylisomucronulatol (9,10-dimethoxypterocarpan-3-O-beta-D-glucoside_qt)	Beta-1 adrenergic receptor	ADRB1	Obesity
HQ3	7-O-methylisomucronulatol (9,10-dimethoxypterocarpan-3-O-beta-D-glucoside_qt)	Alpha-2C adrenergic receptor	ADRA2C	Obesity
HQ3	7-O-methylisomucronulatol (9,10-dimethoxypterocarpan-3-O-beta-D-glucoside_qt)	Alpha-1D adrenergic receptor	ADRA1D	Diabetes
HQ3	7-O-methylisomucronulatol (9,10-dimethoxypterocarpan-3-O-beta-D-glucoside_qt)	Alpha-1B adrenergic receptor	ADRA1B	Obesity
HQ3	7-O-methylisomucronulatol (9,10-dimethoxypterocarpan-3-O-beta-D-glucoside_qt)	Alpha-1A adrenergic receptor	ADRA1A	Cardiovascular disease
HQ4	Astrapterocarpan	Prostaglandin G/H synthase 2	PTGS2	Inflammation
HQ4	Astrapterocarpan	Prostaglandin G/H synthase 1	PTGS1	Inflammation
HQ4	Astrapterocarpan	Peroxisome proliferator activated receptor gamma	PPARG	Obesity
HQ4	Astrapterocarpan	Nitric oxide synthase, inducible	NOS2	Obesity
HQ4	Astrapterocarpan	Mitogen-activated protein kinase 14	MAPK14	Inflammation
HQ4	Astrapterocarpan	Glycogen synthase kinase-3 beta	GSK3B	Diabetes
HQ4	Astrapterocarpan	Thrombin	F2	Cardiovascular disease
HQ4	Astrapterocarpan	Estrogen receptor beta	ESR2	Gastrointestinal disease
HQ4	Astrapterocarpan	Estrogen receptor	ESR1	Cardiovascular disease
HQ4	Astrapterocarpan	Dipeptidyl peptidase IV	DPP4	Obesity
HQ4	Astrapterocarpan	Calmodulin	CaM	Obesity
HQ4	Astrapterocarpan	Androgen receptor	AR	Fatty liver
HQ4	Astrapterocarpan	Beta-2 adrenergic receptor	ADRB2	Obesity
HQ4	Astrapterocarpan	Alpha-1D adrenergic receptor	ADRA1D	Diabetes
HQ4	Astrapterocarpan	Alpha-1B adrenergic receptor	ADRA1B	Obesity
HQ4	Astrapterocarpan	Acetylcholinesterase	ACHE	Obesity
HQ5	Betulinic acid	Progesterone receptor	PGR	Osteoporosis
HQ5	Betulinic acid	Glucocorticoid receptor	NR3C1	Obesity
HQ5	Betulinic acid	Estrogen receptor	ESR1	Cardiovascular disease
HQ5	Betulinic acid	Androgen receptor	AR	Fatty liver
HQ6	Calycosin	Prostaglandin G/H synthase 2	PTGS2	Inflammation
HQ6	Calycosin	Prostaglandin G/H synthase 1	PTGS1	Inflammation
HQ6	Calycosin	Peroxisome proliferator activated receptor gamma	PPARG	Obesity
HQ6	Calycosin	Nitric oxide synthase, inducible	NOS2	Obesity
HQ6	Calycosin	Mitogen-activated protein kinase 14	MAPK14	Inflammation
HQ6	Calycosin	Glycogen synthase kinase-3 beta	GSK3B	Diabetes
HQ6	Calycosin	Estrogen receptor beta	ESR2	Gastrointestinal disease
HQ6	Calycosin	Estrogen receptor	ESR1	Cardiovascular disease
HQ6	Calycosin	Dipeptidyl peptidase IV	DPP4	Obesity
HQ6	Calycosin	Calmodulin	CaM	Obesity
HQ6	Calycosin	Androgen receptor	AR	Fatty liver
HQ6	Calycosin	Beta-2 adrenergic receptor	ADRB2	Obesity
HQ7	Folic acid	Glycogen synthase kinase-3 beta	GSK3B	Diabetes
HQ7	Folic acid	Thrombin	F2	Cardiovascular disease
HQ8	Formononetin	NAD-dependent deacetylase sirtuin-1	SIRT1	Obesity
HQ8	Formononetin	Peroxisome proliferator activated receptor gamma	PPARG	Obesity
HQ8	Formononetin	Transcription factor AP-1	JUN	Osteoporosis
HQ8	Formononetin	Interleukin-4	IL4	Osteoporosis
HQ9	Isomucronulatol	Tissue factor	F3	Obesity
HQ9	Isomucronulatol	Dopamine D1 receptor	DRD1	Diabetes
HQ9	Isomucronulatol	Cytochrome P450 1B1	CYP1B1	Fatty liver
HY1	(-)-Catechin	Fatty acid synthase	FASN	Obesity
HY1	(-)-Catechin	Peroxisome proliferator activated receptor gamma	PPARG	Obesity
HY2	(1S)-1-(4-hydroxybenzyl)-2-methyl-3,4-dihydro-1H-isoquinoline-6,7-diol	D(2) dopamine receptor	DRD2	Inflammation
HY2	(1S)-1-(4-hydroxybenzyl)-2-methyl-3,4-dihydro-1H-isoquinoline-6,7-diol	Estrogen receptor	ESR1	Cardiovascular disease
HY2	(1S)-1-(4-hydroxybenzyl)-2-methyl-3,4-dihydro-1H-isoquinoline-6,7-diol	Estrogen receptor beta	ESR2	Gastrointestinal disease
HY3	Armepavine	Acetylcholinesterase	ACHE	Obesity
HY3	Armepavine	Alpha-1B adrenergic receptor	ADRA1B	Obesity
HY3	Armepavine	Alpha-1D adrenergic receptor	ADRA1D	Diabetes
HY3	Armepavine	Alpha-2B adrenergic receptor	ADRA2B	Cardiovascular disease
HY3	Armepavine	Alpha-2C adrenergic receptor	ADRA2C	Obesity
HY3	Armepavine	Beta-1 adrenergic receptor	ADRB1	Obesity
HY3	Armepavine	Beta-2 adrenergic receptor	ADRB2	Obesity
HY3	Armepavine	Androgen receptor	AR	Fatty liver
HY3	Armepavine	Calmodulin	CaM	Obesity
HY3	Armepavine	Dipeptidyl peptidase IV	DPP4	Obesity
HY3	Armepavine	D(3) dopamine receptor	DRD3	Inflammation
HY3	Armepavine	Estrogen receptor	ESR1	Cardiovascular disease
HY3	Armepavine	Estrogen receptor beta	ESR2	Gastrointestinal disease
HY3	Armepavine	Thrombin	F2	Cardiovascular disease
HY3	Armepavine	Glycogen synthase kinase-3 beta	GSK3B	Diabetes
HY3	Armepavine	5-hydroxytryptamine 2A receptor	HTR2A	Diabetes
HY3	Armepavine	5-hydroxytryptamine 2C receptor	HTR2C	Obesity
HY3	Armepavine	Mitogen-activated protein kinase 14	MAPK14	Inflammation
HY3	Armepavine	Nitric oxide synthase, inducible	NOS2	Obesity
HY3	Armepavine	Delta-type opioid receptor	OPRD1	Gastrointestinal disease
HY3	Armepavine	Mu-type opioid receptor	OPRM1	Obesity
HY3	Armepavine	Peroxisome proliferator activated receptor gamma	PPARG	Obesity
HY3	Armepavine	Prostaglandin G/H synthase 1	PTGS1	Inflammation
HY3	Armepavine	Prostaglandin G/H synthase 2	PTGS2	Inflammation
HY3	Armepavine	Sodium-dependent noradrenaline transporter	SLC6A2	Obesity
HY3	Armepavine	Sodium-dependent dopamine transporter	SLC6A3	Obesity
HY3	Armepavine	Sodium-dependent serotonin transporter	SLC6A4	Obesity
HY4	Epicatechin	Androgen receptor	AR	Fatty liver
HY4	Epicatechin	Dipeptidyl peptidase IV	DPP4	Obesity
HY4	Epicatechin	Estrogen receptor	ESR1	Cardiovascular disease
HY4	Epicatechin	Estrogen receptor beta	ESR2	Gastrointestinal disease
HY4	Epicatechin	Glycogen synthase kinase-3 beta	GSK3B	Diabetes
HY4	Epicatechin	Mitogen-activated protein kinase 14	MAPK14	Inflammation
HY4	Epicatechin	Nitric oxide synthase, inducible	NOS2	Obesity
HY4	Epicatechin	Peroxisome proliferator activated receptor gamma	PPARG	Obesity
HY4	Epicatechin	Prostaglandin G/H synthase 1	PTGS1	Inflammation
HY4	Epicatechin	Prostaglandin G/H synthase 2	PTGS2	Inflammation
HY5	Isorhamnetin	Neutrophil cytosol factor 1	NCF1	Cardiovascular disease
HY5	Isorhamnetin	Oxidized low-density lipoprotein receptor 1	OLR1	Fatty liver
HY5	Isorhamnetin	Xanthine dehydrogenase/oxidase	XDH	Cardiovascular disease
HY6	Kaempferol	Acetylcholinesterase	ACHE	Obesity
HY6	Kaempferol	Alpha-1B adrenergic receptor	ADRA1B	Obesity
HY6	Kaempferol	Androgen receptor	AR	Fatty liver
HY6	Kaempferol	Calmodulin	CaM	Obesity
HY6	Kaempferol	Dipeptidyl peptidase IV	DPP4	Obesity
HY6	Kaempferol	Estrogen receptor	ESR1	Cardiovascular disease
HY6	Kaempferol	Estrogen receptor beta	ESR2	Gastrointestinal disease
HY6	Kaempferol	Thrombin	F2	Cardiovascular disease
HY6	Kaempferol	Coagulation factor VII	F7	Diabetes
HY6	Kaempferol	Glycogen synthase kinase-3 beta	GSK3B	Diabetes
HY6	Kaempferol	Mitogen-activated protein kinase 14	MAPK14	Inflammation
HY6	Kaempferol	Nitric oxide synthase, inducible	NOS2	Obesity
HY6	Kaempferol	Nitric oxide synthase, endothelial	NOS3	Cardiovascular disease
HY6	Kaempferol	Progesterone receptor	PGR	Osteoporosis
HY6	Kaempferol	Peroxisome proliferator activated receptor gamma	PPARG	Obesity
HY6	Kaempferol	Prostaglandin G/H synthase 1	PTGS1	Inflammation
HY6	Kaempferol	Prostaglandin G/H synthase 2	PTGS2	Inflammation
HY6	Kaempferol	Sodium-dependent noradrenaline transporter	SLC6A2	Obesity
HY6	Kaempferol	DNA topoisomerase II	TOP2B	Cancer
HY7	Machiline	Alpha-1A adrenergic receptor	ADRA1A	Cardiovascular disease
HY7	Machiline	Alpha-1B adrenergic receptor	ADRA1B	Obesity
HY7	Machiline	Alpha-1D adrenergic receptor	ADRA1D	Diabetes
HY7	Machiline	Alpha-2A adrenergic receptor	ADRA2A	Obesity
HY7	Machiline	Alpha-2B adrenergic receptor	ADRA2B	Cardiovascular disease
HY7	Machiline	Alpha-2C adrenergic receptor	ADRA2C	Obesity
HY7	Machiline	Beta-1 adrenergic receptor	ADRB1	Obesity
HY7	Machiline	Beta-2 adrenergic receptor	ADRB2	Obesity
HY7	Machiline	Androgen receptor	AR	Fatty liver
HY7	Machiline	Calmodulin	CaM	Obesity
HY7	Machiline	Dipeptidyl peptidase IV	DPP4	Obesity
HY7	Machiline	Estrogen receptor	ESR1	Cardiovascular disease
HY7	Machiline	Estrogen receptor beta	ESR2	Gastrointestinal disease
HY7	Machiline	Thrombin	F2	Cardiovascular disease
HY7	Machiline	Glycogen synthase kinase-3 beta	GSK3B	Diabetes
HY7	Machiline	Mitogen-activated protein kinase 14	MAPK14	Inflammation
HY7	Machiline	Nitric oxide synthase, inducible	NOS2	Obesity
HY7	Machiline	Peroxisome proliferator activated receptor gamma	PPARG	Obesity
HY7	Machiline	Prostaglandin G/H synthase 1	PTGS1	Inflammation
HY7	Machiline	Prostaglandin G/H synthase 2	PTGS2	Inflammation
HY7	Machiline	Sodium-dependent dopamine transporter	SLC6A3	Obesity
HY7	Machiline	Sodium-dependent serotonin transporter	SLC6A4	Obesity
HY8	Quercetin	Aryl hydrocarbon receptor	AHR	Fatty liver
HY8	Quercetin	Arachidonate 5-lipoxygenase	ALOX5	Osteoporosis
HY8	Quercetin	Caspase-3	CASP3	Diabetes
HY8	Quercetin	Caspase-8	CASP8	Diabetes
HY8	Quercetin	Caspase-9	CASP9	Cancer
HY8	Quercetin	Caveolin-1	CAV1	Fatty liver
HY8	Quercetin	C-C motif chemokine 2	CCL2	Diabetes
HY8	Quercetin	G2/mitotic-specific cyclin-B1	CCNB1	Cardiovascular disease
HY8	Quercetin	CD40 ligand	CD40LG	Diabetes
HY8	Quercetin	Cell division control protein 2 homolog	CDK1	Cancer
HY8	Quercetin	Inhibitor of nuclear factor kappa-B kinase subunit alpha	CHUK	Inflammation
HY8	Quercetin	Claudin-4	CLDN4	Fatty liver
HY8	Quercetin	C-reactive protein	CRP	Fatty liver
HY8	Quercetin	Cathepsin D	CTSD	Cardiovascular disease
HY8	Quercetin	Interleukin-8	CXCL8	Inflammation
HY8	Quercetin	Cytochrome P450 1B1	CYP1B1	Fatty liver
HY8	Quercetin	Transcription factor E2F1	E2F1	Diabetes
HY8	Quercetin	Transcription factor E2F2	E2F2	Cardiovascular disease
HY8	Quercetin	Epidermal growth factor receptor	EGFR	Gastrointestinal disease
HY8	Quercetin	Receptor tyrosine-protein kinase erbB-2	ERBB2	Gastrointestinal disease
HY8	Quercetin	Tissue factor	F3	Obesity
HY8	Quercetin	Hypoxia-inducible factor 1-alpha	HIF1A	Cancer
HY8	Quercetin	Hexokinase-2	HK2	Obesity
HY8	Quercetin	Heme oxygenase 1	HMOX1	Fatty liver
HY8	Quercetin	78 kDa glucose-regulated protein	HSPA5	Cancer
HY8	Quercetin	Intercellular adhesion molecule 1	ICAM1	Obesity
HY8	Quercetin	Interferon gamma	IFNG	Diabetes
HY8	Quercetin	Insulin-like growth factor II	IGF2	Fatty liver
HY8	Quercetin	Insulin-like growth factor-binding protein 3	IGFBP3	Fatty liver
HY8	Quercetin	Interleukin-10	IL10	Inflammation
HY8	Quercetin	Interleukin-1 beta	IL1B	Diabetes
HY8	Quercetin	Interleukin-2	IL2	Inflammation
HY8	Quercetin	Interleukin-6	IL6	Inflammation
HY8	Quercetin	Insulin receptor	INSR	Diabetes
HY8	Quercetin	Interferon regulatory factor 1	IRF1	Diabetes
HY8	Quercetin	Transcription factor AP-1	JUN	Osteoporosis
HY8	Quercetin	Maltase-glucoamylase, intestinal	MGAM	Diabetes
HY8	Quercetin	Interstitial collagenase	MMP1	Osteoporosis
HY8	Quercetin	72 kDa type IV collagenase	MMP2	Inflammation
HY8	Quercetin	Matrix metalloproteinase-9	MMP9	Osteoporosis
HY8	Quercetin	Myeloperoxidase	MPO	Obesity
HY8	Quercetin	Myc proto-oncogene protein	MYC	Cancer
HY8	Quercetin	Neutrophil cytosol factor 1	NCF1	Cardiovascular disease
HY8	Quercetin	Nuclear factor erythroid 2-related factor 2	NFE2L2	Cardiovascular disease
HY8	Quercetin	Homeobox protein Nkx-3.1	NKX3-1	Cancer
HY8	Quercetin	Nitric oxide synthase, endothelial	NOS3	Cardiovascular disease
HY8	Quercetin	NAD(P)H dehydrogenase [quinone] 1	NQO1	Cancer
HY8	Quercetin	Ornithine decarboxylase	ODC1	Inflammation
HY8	Quercetin	Poly [ADP-ribose] polymerase 1	PARP1	Cancer
HY8	Quercetin	Tissue-type plasminogen activator	PLAT	Cardiovascular disease
HY8	Quercetin	Urokinase-type plasminogen activator	PLAU	Cancer
HY8	Quercetin	Serum paraoxonase/arylesterase 1	PON1	Cardiovascular disease
HY8	Quercetin	Peroxisome proliferator activated receptor alpha	PPARA	Obesity
HY8	Quercetin	Peroxisome proliferator activated receptor delta	PPARD	Obesity
HY8	Quercetin	Peroxisome proliferator activated receptor gamma	PPARG	Obesity
HY8	Quercetin	Protein kinase C beta type	PRKCB	Obesity
HY8	Quercetin	RAF proto-oncogene serine/threonine-protein kinase	RAF1	Diabetes
HY8	Quercetin	Runt-related transcription factor 2	RUNX2	Diabetes
HY8	Quercetin	E-selectin	SELE	Cardiovascular disease
HY8	Quercetin	Plasminogen activator inhibitor 1	SERPINE1	Diabetes
HY8	Quercetin	Solute carrier family 2, facilitated glucose transporter member 4	SLC2A4	Diabetes
HY8	Quercetin	Superoxide dismutase [Cu-Zn]	SOD1	Fatty liver
HY8	Quercetin	Osteopontin	SPP1	Obesity
HY8	Quercetin	Estrogen sulfotransferase	SULT1E1	Diabetes
HY8	Quercetin	Transforming growth factor beta-1	TGFB1	Obesity
HY8	Quercetin	Thrombomodulin	THBD	Cardiovascular disease
HY8	Quercetin	Tumor necrosis factor	TNF	Inflammation
HY8	Quercetin	Vascular cell adhesion protein 1	VCAM1	Cardiovascular disease
HY8	Quercetin	Vascular endothelial growth factor A	VEGFA	Obesity
HY8	Quercetin	Xanthine dehydrogenase/oxidase	XDH	Cardiovascular disease
HY9	Roemerine	Acetylcholinesterase	ACHE	Obesity
HY9	Roemerine	Alpha-1B adrenergic receptor	ADRA1B	Obesity
HY9	Roemerine	Alpha-1D adrenergic receptor	ADRA1D	Diabetes
HY9	Roemerine	Beta-2 adrenergic receptor	ADRB2	Obesity
HY9	Roemerine	Androgen receptor	AR	Fatty liver
HY9	Roemerine	Dipeptidyl peptidase IV	DPP4	Obesity
HY9	Roemerine	Estrogen receptor	ESR1	Cardiovascular disease
HY9	Roemerine	Estrogen receptor beta	ESR2	Gastrointestinal disease
HY9	Roemerine	Thrombin	F2	Cardiovascular disease
HY9	Roemerine	Delta-type opioid receptor	OPRD1	Gastrointestinal disease
HY9	Roemerine	Retinoic acid receptor RXR-alpha	OPRD1	Gastrointestinal disease
HY9	Roemerine	Mu-type opioid receptor	OPRM1	Obesity
HY9	Roemerine	Prostaglandin G/H synthase 1	PTGS1	Inflammation
HY9	Roemerine	Prostaglandin G/H synthase 2	PTGS2	Inflammation
HY9	Roemerine	Sodium-dependent serotonin transporter	SLC6A4	Obesity
MG1	Betulinic acid	Androgen receptor	AR	Fatty liver
MG1	Betulinic acid	Estrogen receptor	ESR1	Cardiovascular disease
MG1	Betulinic acid	Glucocorticoid receptor	NR3C1	Obesity
MG1	Betulinic acid	Progesterone receptor	PGR	Osteoporosis
MG2	Epicatechin	Androgen receptor	AR	Fatty liver
MG2	Epicatechin	Dipeptidyl peptidase IV	DPP4	Obesity
MG2	Epicatechin	Estrogen receptor	ESR1	Cardiovascular disease
MG2	Epicatechin	Estrogen receptor beta	ESR2	Gastrointestinal disease
MG2	Epicatechin	Glycogen synthase kinase-3 beta	GSK3B	Diabetes
MG2	Epicatechin	Mitogen-activated protein kinase 14	MAPK14	Inflammation
MG2	Epicatechin	Nitric oxide synthase, inducible	NOS2	Obesity
MG2	Epicatechin	Peroxisome proliferator activated receptor gamma	PPARG	Obesity
MG2	Epicatechin	Prostaglandin G/H synthase 1	PTGS1	Inflammation
MG2	Epicatechin	Prostaglandin G/H synthase 2	PTGS2	Inflammation
MG3	Quercetin	Aryl hydrocarbon receptor	AHR	Fatty liver
MG3	Quercetin	Arachidonate 5-lipoxygenase	ALOX5	Osteoporosis
MG3	Quercetin	Caspase-3	CASP3	Diabetes
MG3	Quercetin	Caspase-8	CASP8	Diabetes
MG3	Quercetin	Caspase-9	CASP9	Cancer
MG3	Quercetin	Caveolin-1	CAV1	Fatty liver
MG3	Quercetin	C-C motif chemokine 2	CCL2	Diabetes
MG3	Quercetin	G2/mitotic-specific cyclin-B1	CCNB1	Cardiovascular disease
MG3	Quercetin	CD40 ligand	CD40LG	Diabetes
MG3	Quercetin	Cell division control protein 2 homolog	CDK1	Cancer
MG3	Quercetin	Inhibitor of nuclear factor kappa-B kinase subunit alpha	CHUK	Inflammation
MG3	Quercetin	Claudin-4	CLDN4	Fatty liver
MG3	Quercetin	C-reactive protein	CRP	Fatty liver
MG3	Quercetin	Cathepsin D	CTSD	Cardiovascular disease
MG3	Quercetin	Interleukin-8	CXCL8	Inflammation
MG3	Quercetin	Cytochrome P450 1B1	CYP1B1	Fatty liver
MG3	Quercetin	Transcription factor E2F1	E2F1	Diabetes
MG3	Quercetin	Transcription factor E2F2	E2F2	Cardiovascular disease
MG3	Quercetin	Epidermal growth factor receptor	EGFR	Gastrointestinal disease
MG3	Quercetin	Receptor tyrosine-protein kinase erbB-2	ERBB2	Gastrointestinal disease
MG3	Quercetin	Tissue factor	F3	Obesity
MG3	Quercetin	Hypoxia-inducible factor 1-alpha	HIF1A	Cancer
MG3	Quercetin	Hexokinase-2	HK2	Obesity
MG3	Quercetin	Heme oxygenase 1	HMOX1	Fatty liver
MG3	Quercetin	78 kDa glucose-regulated protein	HSPA5	Cancer
MG3	Quercetin	Intercellular adhesion molecule 1	ICAM1	Obesity
MG3	Quercetin	Interferon gamma	IFNG	Diabetes
MG3	Quercetin	Insulin-like growth factor II	IGF2	Fatty liver
MG3	Quercetin	Insulin-like growth factor-binding protein 3	IGFBP3	Fatty liver
MG3	Quercetin	Interleukin-10	IL10	Inflammation
MG3	Quercetin	Interleukin-1 beta	IL1B	Diabetes
MG3	Quercetin	Interleukin-2	IL2	Inflammation
MG3	Quercetin	Interleukin-6	IL6	Inflammation
MG3	Quercetin	Insulin receptor	INSR	Diabetes
MG3	Quercetin	Interferon regulatory factor 1	IRF1	Diabetes
MG3	Quercetin	Transcription factor AP-1	JUN	Osteoporosis
MG3	Quercetin	Maltase-glucoamylase, intestinal	MGAM	Diabetes
MG3	Quercetin	Interstitial collagenase	MMP1	Osteoporosis
MG3	Quercetin	72 kDa type IV collagenase	MMP2	Inflammation
MG3	Quercetin	Matrix metalloproteinase-9	MMP9	Osteoporosis
MG3	Quercetin	Myeloperoxidase	MPO	Obesity
MG3	Quercetin	Myc proto-oncogene protein	MYC	Cancer
MG3	Quercetin	Neutrophil cytosol factor 1	NCF1	Cardiovascular disease
MG3	Quercetin	Nuclear factor erythroid 2-related factor 2	NFE2L2	Cardiovascular disease
MG3	Quercetin	Homeobox protein Nkx-3.1	NKX3-1	Cancer
MG3	Quercetin	Nitric oxide synthase, endothelial	NOS3	Cardiovascular disease
MG3	Quercetin	NAD(P)H dehydrogenase [quinone] 1	NQO1	Cancer
MG3	Quercetin	Ornithine decarboxylase	ODC1	Inflammation
MG3	Quercetin	Poly [ADP-ribose] polymerase 1	PARP1	Cancer
MG3	Quercetin	Tissue-type plasminogen activator	PLAT	Cardiovascular disease
MG3	Quercetin	Urokinase-type plasminogen activator	PLAU	Cardiovascular disease
MG3	Quercetin	Serum paraoxonase/arylesterase 1	PON1	Cardiovascular disease
MG3	Quercetin	Peroxisome proliferator activated receptor alpha	PPARA	Obesity
MG3	Quercetin	Peroxisome proliferator activated receptor delta	PPARD	Obesity
MG3	Quercetin	Peroxisome proliferator activated receptor gamma	PPARG	Obesity
MG3	Quercetin	Protein kinase C beta type	PRKCB	Obesity
MG3	Quercetin	RAF proto-oncogene serine/threonine-protein kinase	RAF1	Diabetes
MG3	Quercetin	Runt-related transcription factor 2	RUNX2	Diabetes
MG3	Quercetin	E-selectin	SELE	Cardiovascular disease
MG3	Quercetin	Plasminogen activator inhibitor 1	SERPINE1	Diabetes
MG3	Quercetin	Solute carrier family 2, facilitated glucose transporter member 4	SLC2A4	Diabetes
MG3	Quercetin	Superoxide dismutase [Cu-Zn]	SOD1	Fatty liver
MG3	Quercetin	Osteopontin	SPP1	Obesity
MG3	Quercetin	Estrogen sulfotransferase	SULT1E1	Diabetes
MG3	Quercetin	Transforming growth factor beta-1	TGFB1	Obesity
MG3	Quercetin	Thrombomodulin	THBD	Cardiovascular disease
MG3	Quercetin	Tumor necrosis factor	TNF	Inflammation
MG3	Quercetin	Vascular cell adhesion protein 1	VCAM1	Obesity
MG3	Quercetin	Vascular endothelial growth factor A	VEGFA	Obesity
MG3	Quercetin	Xanthine dehydrogenase/oxidase	XDH	Cardiovascular disease
ZQ1	Hesperetin	Androgen receptor	AR	Fatty liver
ZQ1	Hesperetin	Calmodulin	CaM	Obesity
ZQ1	Hesperetin	Dipeptidyl peptidase IV	DPP4	Obesity
ZQ1	Hesperetin	Estrogen receptor	ESR1	Cardiovascular disease
ZQ1	Hesperetin	Estrogen receptor beta	ESR2	Gastrointestinal disease
ZQ1	Hesperetin	Glycogen synthase kinase-3 beta	GSK3B	Diabetes
ZQ1	Hesperetin	Mitogen-activated protein kinase 14	MAPK14	Inflammation
ZQ1	Hesperetin	Nitric oxide synthase, inducible	NOS2	Obesity
ZQ1	Hesperetin	Peroxisome proliferator activated receptor gamma	PPARG	Obesity
ZQ1	Hesperetin	Prostaglandin G/H synthase 1	PTGS1	Inflammation
ZQ1	Hesperetin	Prostaglandin G/H synthase 2	PTGS2	Inflammation
ZQ2	Naringenin	Androgen receptor	AR	Fatty liver
ZQ2	Naringenin	Dipeptidyl peptidase IV	DPP4	Obesity
ZQ2	Naringenin	Estrogen receptor	ESR1	Cardiovascular disease
ZQ2	Naringenin	Estrogen receptor beta	ESR2	Gastrointestinal disease
ZQ2	Naringenin	Glycogen synthase kinase-3 beta	GSK3B	Diabetes
ZQ2	Naringenin	Mitogen-activated protein kinase 14	MAPK14	Inflammation
ZQ2	Naringenin	Nitric oxide synthase, inducible	NOS2	Obesity
ZQ2	Naringenin	Peroxisome proliferator activated receptor gamma	PPARG	Obesity
ZQ2	Naringenin	Prostaglandin G/H synthase 1	PTGS1	Inflammation
ZQ2	Naringenin	Prostaglandin G/H synthase 2	PTGS2	Inflammation
ZQ3	Nobiletin	Androgen receptor	AR	Fatty liver
ZQ3	Nobiletin	Calmodulin	CaM	Obesity
ZQ3	Nobiletin	Dipeptidyl peptidase IV	DPP4	Obesity
ZQ3	Nobiletin	Estrogen receptor	ESR1	Cardiovascular disease
ZQ3	Nobiletin	Estrogen receptor beta	ESR2	Gastrointestinal disease
ZQ3	Nobiletin	Coagulation factor Xa	F10	Cardiovascular disease
ZQ3	Nobiletin	Thrombin	F2	Cardiovascular disease
ZQ3	Nobiletin	Coagulation factor VII	F7	Diabetes
ZQ3	Nobiletin	Glycogen synthase kinase-3 beta	GSK3B	Diabetes
ZQ3	Nobiletin	Nitric oxide synthase, inducible	NOS2	Obesity
ZQ3	Nobiletin	Peroxisome proliferator activated receptor gamma	PPARG	Obesity
ZQ3	Nobiletin	Prostaglandin G/H synthase 1	PTGS1	Inflammation
ZQ3	Nobiletin	Prostaglandin G/H synthase 2	PTGS2	Inflammation
ZQ3	Nobiletin	DNA topoisomerase II	TOP2B	Cancer
LZ1	Epoxyganoderiol B	Androgen receptor	AR	Fatty liver
LZ10	Lucialdehyde A	Androgen receptor	AR	Fatty liver
LZ10	Lucialdehyde A	Estrogen receptor	ESR1	Cardiovascular disease
LZ10	Lucialdehyde A	Glucocorticoid receptor	NR3C1	Obesity
LZ11	Lucialdehyde B	Androgen receptor	AR	Fatty liver
LZ11	Lucialdehyde B	Glucocorticoid receptor	NR3C1	Obesity
LZ11	Lucialdehyde B	Progesterone receptor	PGR	Osteoporosis
LZ12	Lucialdehyde C	Androgen receptor	AR	Fatty liver
LZ12	Lucialdehyde C	Estrogen receptor	ESR1	Cardiovascular disease
LZ12	Lucialdehyde C	Glucocorticoid receptor	NR3C1	Obesity
LZ13	Stellasterol	Androgen receptor	AR	Fatty liver
LZ13	Stellasterol	Estrogen receptor	ESR1	Cardiovascular disease
LZ13	Stellasterol	Glucocorticoid receptor	NR3C1	Obesity
LZ13	Stellasterol	Mineralocorticoid receptor	NR3C2	Cancer
LZ13	Stellasterol	Progesterone receptor	PGR	Osteoporosis
LZ2	Ergosta-4,6,8(14),22-tetraene-3-one	Androgen receptor	AR	Fatty liver
LZ2	Ergosta-4,6,8(14),22-tetraene-3-one	Estrogen receptor	ESR1	Cardiovascular disease
LZ2	Ergosta-4,6,8(14),22-tetraene-3-one	Glucocorticoid receptor	NR3C1	Obesity
LZ2	Ergosta-4,6,8(14),22-tetraene-3-one	Progesterone receptor	PGR	Osteoporosis
LZ3	Ergosta-7,22-dien-3-yllinoleate	Acetylcholinesterase	ACHE	Obesity
LZ3	Ergosta-7,22-dien-3-yllinoleate	Androgen receptor	AR	Fatty liver
LZ3	Ergosta-7,22-dien-3-yllinoleate	Estrogen receptor	ESR1	Cardiovascular disease
LZ3	Ergosta-7,22-dien-3-yllinoleate	Estrogen receptor beta	ESR2	Gastrointestinal disease
LZ3	Ergosta-7,22-dien-3-yllinoleate	Coagulation factor Xa	F10	Cardiovascular disease
LZ3	Ergosta-7,22-dien-3-yllinoleate	Thrombin	F2	Cardiovascular disease
LZ3	Ergosta-7,22-dien-3-yllinoleate	Coagulation factor VII	F7	Diabetes
LZ3	Ergosta-7,22-dien-3-yllinoleate	Glucocorticoid receptor	NR3C1	Obesity
LZ3	Ergosta-7,22-dien-3-yllinoleate	Mineralocorticoid receptor	NR3C2	Cancer
LZ3	Ergosta-7,22-dien-3-yllinoleate	Mu-type opioid receptor	OPRM1	Obesity
LZ3	Ergosta-7,22-dien-3-yllinoleate	Peroxisome proliferator-activated receptor gamma	PPARG	Obesity
LZ3	Ergosta-7,22-dien-3-yllinoleate	Prostaglandin G/H synthase 1	PTGS1	Inflammation
LZ3	Ergosta-7,22-dien-3-yllinoleate	Prostaglandin G/H synthase 2	PTGS2	Inflammation
LZ4	Ergosta-7,9(11),22-Trien-3β,5α,6α-Triol	Androgen receptor	AR	Fatty liver
LZ4	Ergosta-7,9(11),22-Trien-3β,5α,6α-Triol	Estrogen receptor	ESR1	Cardiovascular disease
LZ4	Ergosta-7,9(11),22-Trien-3β,5α,6α-Triol	Glucocorticoid receptor	NR3C1	Obesity
LZ4	Ergosta-7,9(11),22-Trien-3β,5α,6α-Triol	Mineralocorticoid receptor	NR3C2	Cancer
LZ5	Ergosterol peroxide	Androgen receptor	AR	Fatty liver
LZ5	Ergosterol peroxide	Estrogen receptor	ESR1	Cardiovascular disease
LZ5	Ergosterol peroxide	Glucocorticoid receptor	NR3C1	Obesity
LZ6	Ganoderal B	Androgen receptor	AR	Fatty liver
LZ6	Ganoderal B	Estrogen receptor	ESR1	Cardiovascular disease
LZ6	Ganoderal B	Glucocorticoid receptor	NR3C1	Obesity
LZ6	Ganoderal B	Progesterone receptor	PGR	Osteoporosis
LZ7	Ganoderic aldehyde A	Androgen receptor	AR	Fatty liver
LZ7	Ganoderic aldehyde A	Estrogen receptor	ESR1	Cardiovascular disease
LZ7	Ganoderic aldehyde A	Glucocorticoid receptor	NR3C1	Obesity
LZ8	Ganoderol A	Androgen receptor	AR	Fatty liver
LZ8	Ganoderol A	Estrogen receptor	ESR1	Cardiovascular disease
LZ9	Ganodosterone	Androgen receptor	AR	Fatty liver
LZ9	Ganodosterone	Glucocorticoid receptor	NR3C1	Obesity
